# Supplementary material
Source: PubMed Central journal article supplement (PMC6322885)

**Supporting Information Figure S1. Excision product mapping before and after removing reads with mismatches/gaps.** Image shows bam file reads from XR-seq are enriched with lengths around 26 nucleotides. Due to the short-read nature, a great proportion of reads have mismatches/gaps after alignment. We use bamtools to remove such reads. Before and after filtering snapshots are shown for (A) ribosomal gene (rDNA) and (B) *DHFR* for human cell line NHF1.

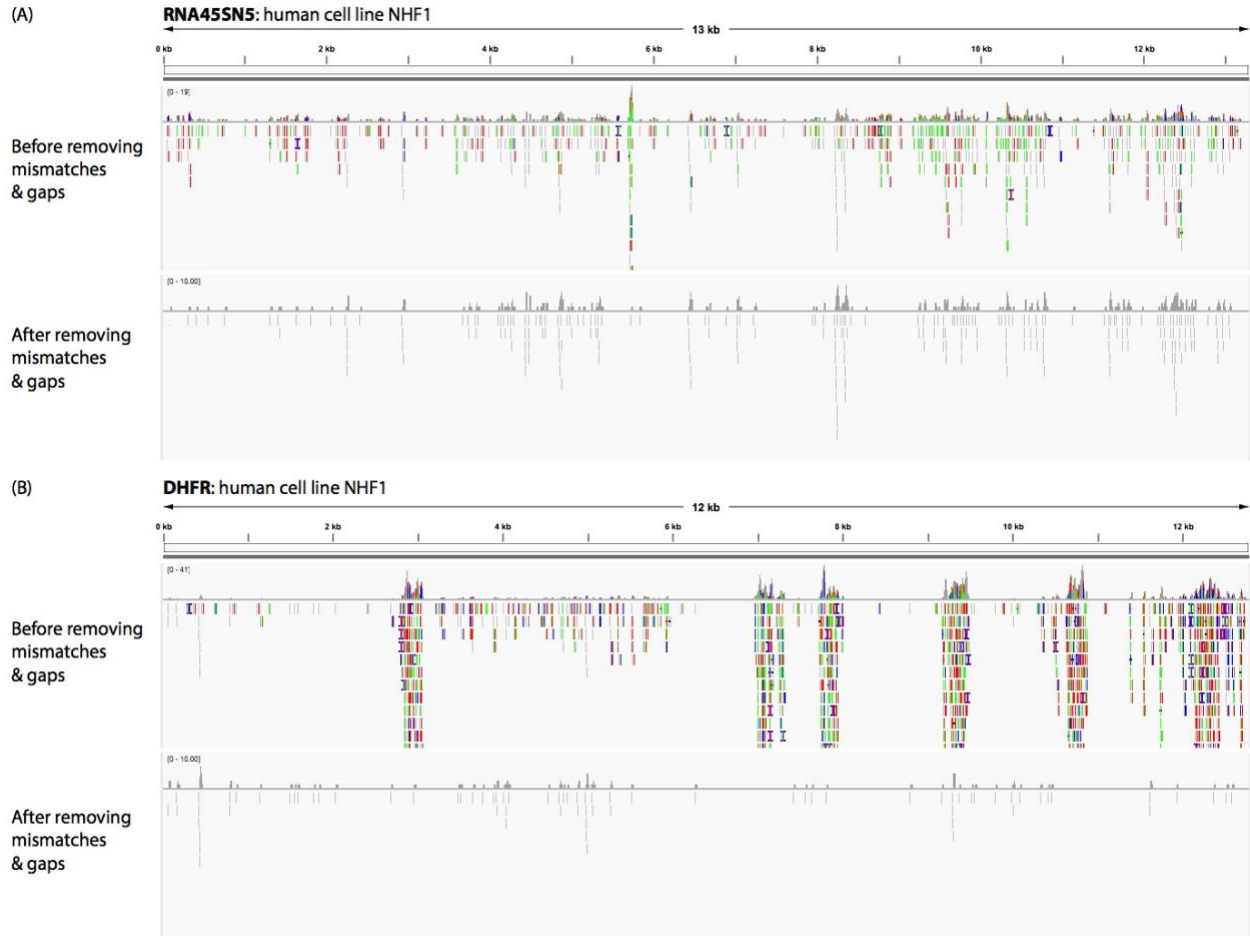

**Supporting Information Figure S2. The GG/CC and AA/TT content in rDNA, *DHFR* and *Dhfr* of humans and mice.**

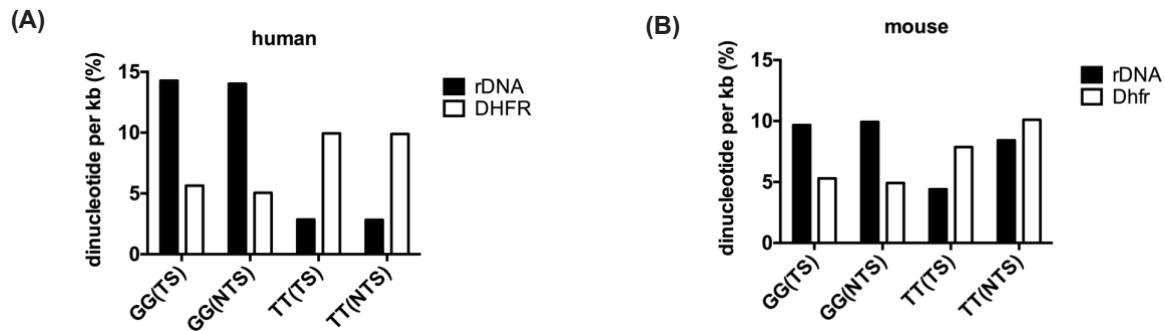

Supplement: supp_RA118.006121_141116_0_supp_232870_phy05d.pdf [file supp_RA118.006121_141116_0_supp_232870_phy05d.pdf]
